# Supplementary material for: Eco-friendly synthesis of an α-Fe2O3/rGO nanocomposite and its application in high-performance asymmetric supercapacitors
Source: Royal Society of Chemistry journal article supplement (doi:10.1039/d4cp00592a), 2024-01-01
Supplement: d4cp00592a1.pdf [file d4cp00592a1.pdf]

## Supporting Informations

### Eco-Friendly Synthesis of $\alpha$ -Fe<sub>2</sub>O<sub>3</sub>/rGO Nanocomposite and its Application in High-Performance Asymmetric Supercapacitors

Sabiar Rahaman<sup>a§</sup>, Azam Raza<sup>b§</sup>, Aadil Rahid Lone<sup>a§</sup>, Mohammad Muaz<sup>b</sup>, SM Hasan Zaidi<sup>b</sup>,  
Mohammad Asif Adeeb<sup>b</sup>, Farasha Sama<sup>b\*</sup>, Kavita Pandey<sup>a\*</sup>, Absar Ahmad<sup>b\*</sup>

<sup>a</sup>Centre for Nano and Soft Matter Sciences (CeNS), Shivanapura, Bangalore 562162, INDIA

<sup>b</sup>Interdisciplinary Nanotechnology Centre, Aligarh Muslim University, Aligarh 202002, INDIA

\* Corresponding Authors: [farashasamachem@gmail.com](mailto:farashasamachem@gmail.com), [kavitapandey@cens.res.in](mailto:kavitapandey@cens.res.in),  
[aahmad786in@gmail.com](mailto:aahmad786in@gmail.com)

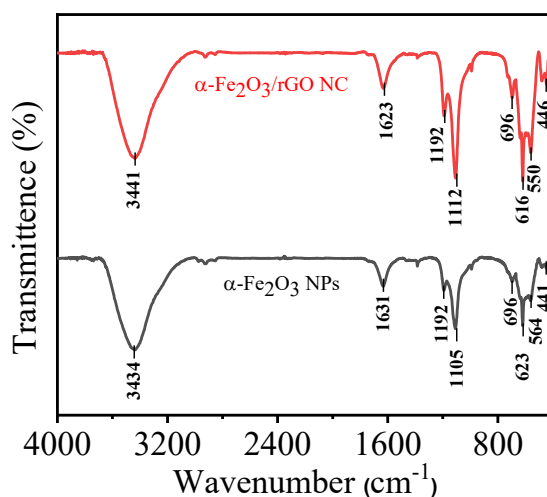

**Fig. S1** Full range FTIR diagram of  $\alpha$ -Fe<sub>2</sub>O<sub>3</sub> NPs and  $\alpha$ -Fe<sub>2</sub>O<sub>3</sub>/rGO NC.

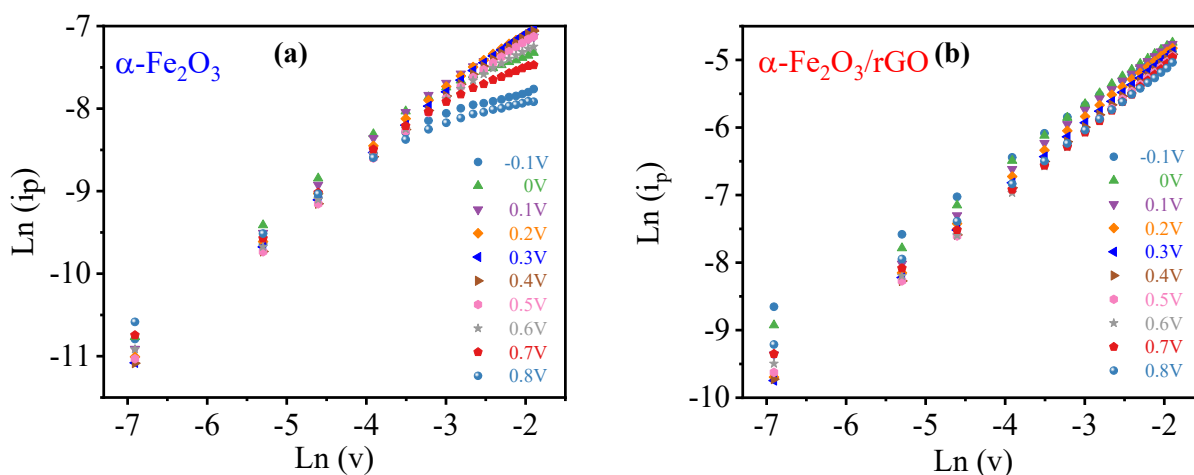

**Fig. S2**  $\log i(V)$  versus  $\log (v)$  plot to calculate b values for (a)  $\alpha$ -Fe<sub>2</sub>O<sub>3</sub> NPs and (b)  $\alpha$ -Fe<sub>2</sub>O<sub>3</sub>/rGO NC.

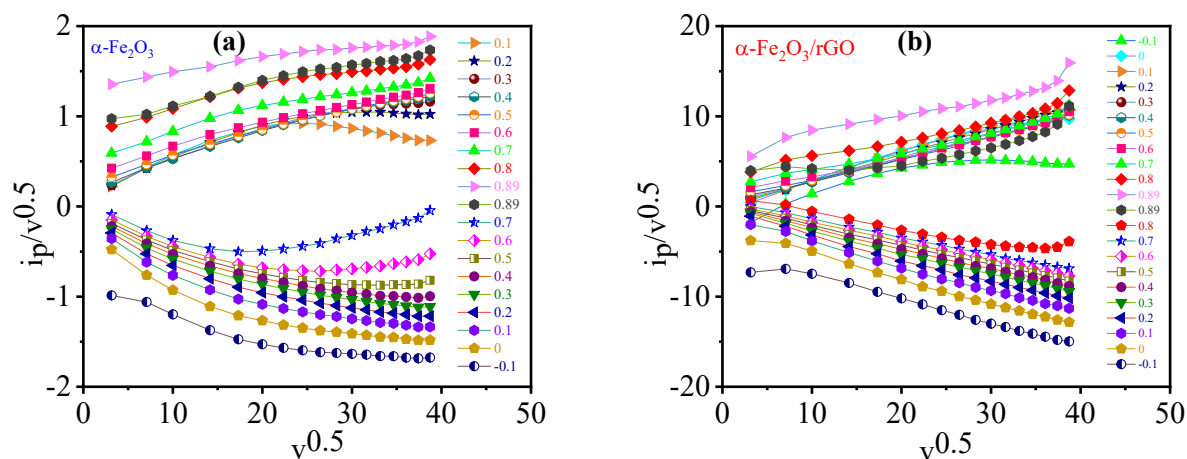

**Fig. S3** Plotting of  $\frac{i_p}{v^{0.5}}$  vs.  $v^{1/2}$  at different potentials for (a)  $\alpha\text{-Fe}_2\text{O}_3$  NPs and (b)  $\alpha\text{-Fe}_2\text{O}_3/\text{rGO}$  NC.

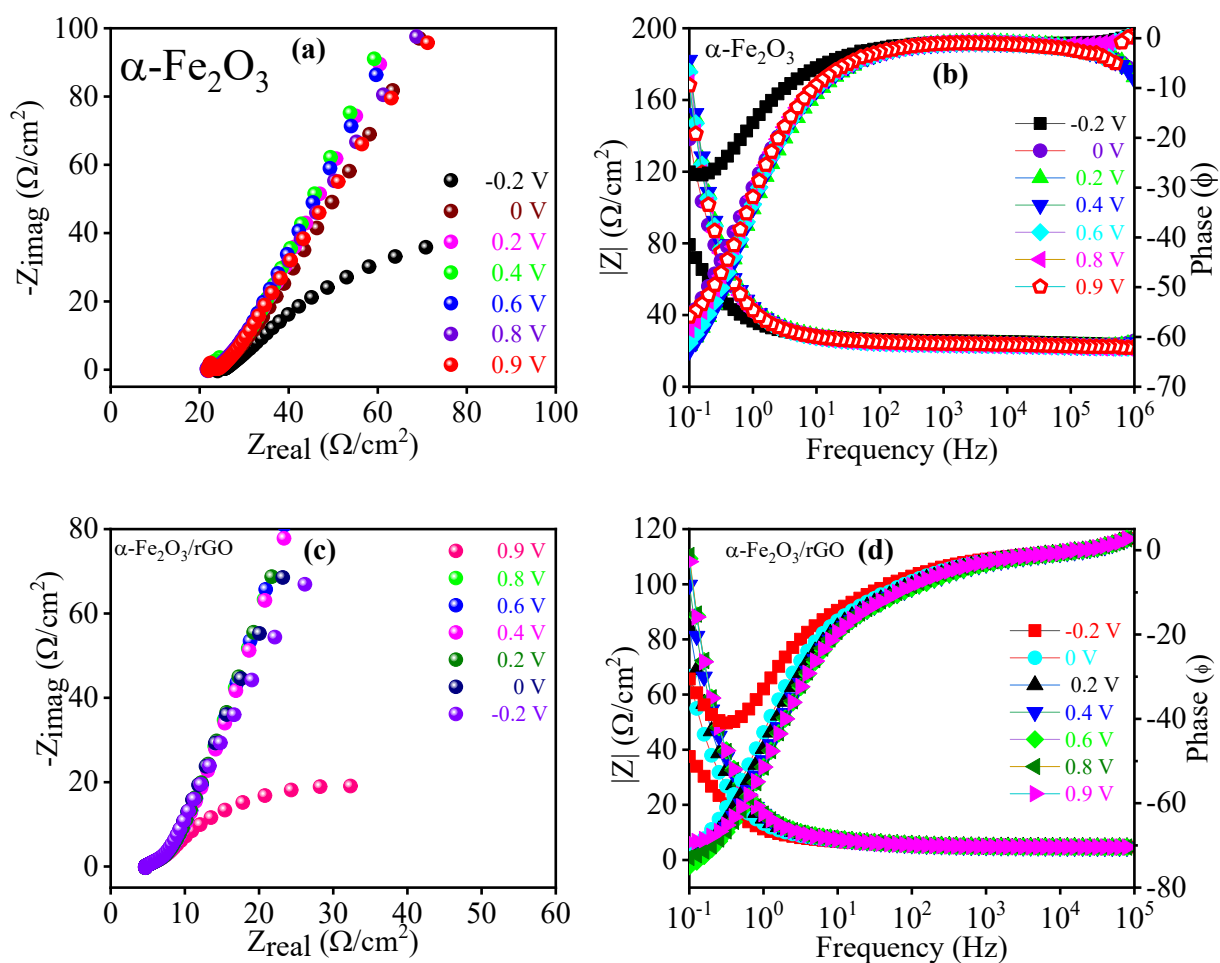

**Fig. S4** Nyquist and Bode plots at different potentials for (a-b)  $\alpha\text{-Fe}_2\text{O}_3$  NPs and (c-d)  $\alpha\text{-Fe}_2\text{O}_3/\text{rGO}$  NC.

**Table S1: Room temperature phonon modes of  $\alpha$ -Fe<sub>2</sub>O<sub>3</sub> and  $\alpha$ -Fe<sub>2</sub>O<sub>3</sub>/rGO**

| <b>Raman peaks</b>  | <b>reduced graphene oxide<sup>1, 2</sup></b> | <b><math>\alpha</math>-Fe<sub>2</sub>O<sub>3</sub> NPs</b> | <b><math>\alpha</math>-Fe<sub>2</sub>O<sub>3</sub>/rGO NC</b> |
|---------------------|----------------------------------------------|------------------------------------------------------------|---------------------------------------------------------------|
| A <sub>1g</sub> (1) | .....                                        | 218                                                        | 216                                                           |
| E <sub>g</sub> (1)  | .....                                        | 287                                                        | 286                                                           |
| E <sub>g</sub> (2)  | .....                                        | 404                                                        | 402                                                           |
| D                   | 1344                                         | 1320                                                       | 1319                                                          |
| G                   | 1579                                         | 1574                                                       | 1569                                                          |

**Table S2: Comparison of I<sub>D</sub>/I<sub>G</sub> ratio**

| <b>Sample</b>                                                 | <b>I<sub>D</sub>/I<sub>G</sub></b> |
|---------------------------------------------------------------|------------------------------------|
| <b>reduced graphene oxide<sup>3</sup></b>                     | 0.61                               |
| <b><math>\alpha</math>-Fe<sub>2</sub>O<sub>3</sub> NPs</b>    | 0.82                               |
| <b><math>\alpha</math>-Fe<sub>2</sub>O<sub>3</sub>/rGO NC</b> | 0.83                               |

**Table S3: Vibrations corresponding to the functional groups**

| <b>Functional group</b> | <b><math>\alpha</math>-Fe<sub>2</sub>O<sub>3</sub> NPs (cm<sup>-1</sup>)</b> | <b><math>\alpha</math>-Fe<sub>2</sub>O<sub>3</sub>/rGO NC (cm<sup>-1</sup>)</b> |
|-------------------------|------------------------------------------------------------------------------|---------------------------------------------------------------------------------|
| Fe-O <sup>4, 5</sup>    | 441<br>(Stretching vibrations)                                               | 446<br>(Stretching vibrations)                                                  |
| Fe-O <sup>4, 6</sup>    | 564<br>(Stretching vibrations)                                               | 550<br>(Stretching vibrations)                                                  |
| Fe-O <sup>4, 6</sup>    | 623                                                                          | 616                                                                             |
| Fe-O <sup>4, 6</sup>    | 696                                                                          | 696                                                                             |
| Fe-O-H <sup>7</sup>     | 1105                                                                         | 1112                                                                            |
| C-OH <sup>8</sup>       | 1192                                                                         | 1192                                                                            |
| C=C <sup>9</sup>        | 1631<br>(Bending vibrations)                                                 | 1623<br>(Bending vibrations)                                                    |
| O-H <sup>10</sup>       | 3434                                                                         | 3441                                                                            |

**Table S4:  $\alpha$ -Fe<sub>2</sub>O<sub>3</sub> NPs and  $\alpha$ -Fe<sub>2</sub>O<sub>3</sub>/rGO NCs with corresponding absorption peaks and energy gap (eV)**

| Samples                                          | Absorption peak (nm) | Absorption peak (nm) Ref <sup>1, 12</sup> | Direct bandgap (eV) | Indirect band gap (eV) |
|--------------------------------------------------|----------------------|-------------------------------------------|---------------------|------------------------|
| $\alpha$ -Fe <sub>2</sub> O <sub>3</sub> NPs     | 450-550              | 500 - 700                                 | 1.65                | 2.007                  |
| $\alpha$ -Fe <sub>2</sub> O <sub>3</sub> /rGO NC | 450-575              | 574                                       | 1.63                | 1.93                   |

**Table S5: Summary of EIS parameter of  $\alpha$ -Fe<sub>2</sub>O<sub>3</sub> NPs and  $\alpha$ -Fe<sub>2</sub>O<sub>3</sub>/rGO NCs**

| Sample                                            | R <sub>s</sub> ( $\Omega$ ) | R <sub>ct</sub> ( $\Omega$ ) | $\alpha$ |
|---------------------------------------------------|-----------------------------|------------------------------|----------|
| $\alpha$ -Fe <sub>2</sub> O <sub>3</sub> NPs      | 21.6                        | 2.14                         | 0.466    |
| $\alpha$ -Fe <sub>2</sub> O <sub>3</sub> /rGO NCs | 4.70                        | 0.40                         | 0.737    |

**Table S6: Comparison of supercapacitor performance with the literatures**

| S. No. | Active Electrode Material                                        | Potential Window | Electrolyte                           | Capacitance             | Current Density/ Scan Rate | Capacitance Retention Rate (Stability) |  |
|--------|------------------------------------------------------------------|------------------|---------------------------------------|-------------------------|----------------------------|----------------------------------------|--|
| 1      | $\alpha$ -Fe <sub>2</sub> O <sub>3</sub> thin film <sup>13</sup> | -1.5 to 0V       | 0.5 M Na <sub>2</sub> SO <sub>3</sub> | 142 F/g                 | 10 mA/cm <sup>2</sup>      | -                                      |  |
| 2      | Fe <sub>2</sub> O <sub>3</sub> @CC <sup>14</sup>                 | -1.2 to 0V       | 1 M LiNO <sub>3</sub>                 | 29 mF/cm <sup>2</sup>   | 1mV/s                      | -                                      |  |
| 3      | rGO/Cu-MOF <sup>15</sup>                                         | 0 to 0.5V        | 1 M KCl                               | 44.6 mF/cm <sup>2</sup> | 5 mV/s                     | 69 % after 1000 cycles at 0.0125 mA/cm |  |
| 4      | Co/Mn-MOFs@Rice Husks <sup>16</sup>                              | 0 to 0.8V        | 2 M KCl                               | 30.3 F/g                | 10 mV/s                    | 39 % after 5000 cycles at 0.5 A/g      |  |

|    |                                                        |                |                                       |                         |                          |                                                     |                  |
|----|--------------------------------------------------------|----------------|---------------------------------------|-------------------------|--------------------------|-----------------------------------------------------|------------------|
| 5  | Co(OH) <sub>2</sub> /Ni <sup>17</sup>                  | -0.3 to 0.5V   | 2 M KOH                               | 22.9 mF/cm <sup>2</sup> | 5 mV/s                   | 92 % after 10000 cycles at 0.09 mA/cm <sub>2</sub>  |                  |
| 6  | γ-CD-MOF/GO/M G-600//γ-CD-MOF/GO/M G-600 <sup>18</sup> | -0.2V to 0.8V  | 1 M H <sub>2</sub> SO <sub>4</sub>    | 111.3 F/g               | 1 A/g                    | 90 % after 5000 cycles at 5 A/g                     |                  |
| 7  | Cu <sub>3</sub> (THQ) <sub>2</sub> -BPY <sup>19</sup>  | -0.3 to -0.9 V | 1 M KOH                               | 66.1 F/g                | 10 mV/s                  | -                                                   |                  |
| 8  | TiO <sub>2</sub> nanotubes <sup>20</sup>               | 0 to 1V        | 0.5 M Na <sub>2</sub> SO <sub>4</sub> | 23.2 mF/cm <sup>2</sup> | 2 mV/s                   | 80 % after 5000 cycles at 1 mA/cm <sup>2</sup>      |                  |
| 9  | NiCo <sub>2</sub> O <sub>4</sub> <sup>21</sup>         | -0.2 to 0.5V   | 2 M KOH                               | 40.6 mF/cm <sup>2</sup> | 0.133 mA/cm <sup>2</sup> | 96 % after 10000 cycles at 0.533 mA/cm <sup>2</sup> |                  |
| 10 | α-Fe <sub>2</sub> O <sub>3</sub> /rGO NC <sup>22</sup> | -0.2 to 1.9V   | 1 M Na <sub>2</sub> SO <sub>4</sub>   | 90.2 mF/cm <sup>2</sup> | 1 mV/s                   | 112 %after 10000 cycles at 5 mA/cm <sup>2</sup>     | <b>This Work</b> |

## References

1. H.-J. Song, X.-H. Jia, N. Li, X.-F. Yang and H. Tang, *Journal of Materials Chemistry*, 2012, **22**, 895-902.
2. M. Kumar and J. Randhawa, *Adaptable Platform for Wastewater Management*.
3. A. Miri, M. Khatami and M. Sarani, *Journal of Inorganic and Organometallic Polymers and Materials*, 2020, **30**, 767-774.
4. J. M. Polfus and K. Jayasayee, *Carbon*, 2019, **152**, 497-502.
5. B. G. Ghule, N. M. Shinde, S. D. Raut, S. K. Gore, S. F. Shaikh, S. U. Ekar, M. Ubaidullah, J. J. Pak and R. S. Mane, *Materials Chemistry and Physics*, 2022, **278**, 125617.
6. Q. Zhou, C. Hong, Y. Yao, A. M. Ibrahim, L. Xu, R. Kumar, S. M. Talballa, S. H. Kim and A. Umar, *Materials*, 2017, **10**, 799.
7. C. D. Zangmeister, *Chemistry of Materials*, 2010, **22**, 5625-5629.
8. C. Xu, X. Wang and J. Zhu, *The Journal of Physical Chemistry C*, 2008, **112**, 19841-19845.
9. A. A. Ibrahim, P. Tiwari, M. S. Al-Assiri, A. E. Al-Salami, A. Umar, R. Kumar, S. H. Kim, Z. A. Ansari and S. Baskoutas, in *Materials* 2017, vol. 10.
10. C. Xu, R.-s. Yuan and X. Wang, *New Carbon Materials*, 2014, **29**, 61-66.
11. A. Lassoued, B. Dkhil, A. Gadri and S. Ammar, *Results in Physics*, 2017, **7**, 3007-3015.
12. H. Li, Q. Zhao, X. Li, Z. Zhu, M. Tade and S. Liu, *Journal of Nanoparticle Research*, 2013, **15**, 1670.
13. S. Khatavkar and S. D. Sartale, *J. Solid State Electrochem.*, 2017, **21**.
14. L. Geng, Z. Gao and Q. Deng, *Metals*, 2018, **8**, 939.
15. Y.-F. Wang, S.-Y. Yang, Y. Yue and S.-W. Bian, *J. Alloys Compd.*, 2020, **835**, 155238.
16. H. Kim, M. Sohail, C. Wang, M. Rosillo-Lopez, K. Baek, J. Koo, M. W. Seo, S. Kim, J. S. Foord and S. O. Han, *Scientific reports*, 2019, **9**, 8984.
17. B. S. Soram, J. Dai, T. Kshetri, N. H. Kim and J. H. Lee, *Chem. Eng. J.*, 2020, **391**, 123540.

18. W. Zhang, Z. Zheng, L. Lin, X. Zhang, M. Bae, J. Lee, J. Xie, G. Diao, H. J. Im and Y. Piao, *Advanced Science*, 2023, **10**, 2304062.
19. J. Y. Choi, J. Flood, M. Stodolka, H. T. Pham and J. Park, *ACS nano*, 2022, **16**, 3145-3151.
20. J. Zhang, Y. Wang, J. Wu, X. Shu, C. Yu, J. Cui, Y. Qin, Y. Zhang, P. M. Ajayan and Y. Wu, *Chem. Eng. J.*, 2017, **313**, 1071-1081.
21. Z. Wu, Y. Zhu and X. Ji, *Journal of Materials Chemistry A*, 2014, **2**, 14759-14772.
22. Y. Liu, N. Wang, C. Yang and W. Hu, *Ceramics International*, 2016, **42**, 11411-11416.
